# Supplementary material for: Long-Term Impacts of Forest Ditching on Non-Aquatic Biodiversity: Conservation Perspectives for a Novel Ecosystem
Source: PLoS One. 2013 Apr 30;8(4):e63086. doi: 10.1371/journal.pone.0063086 (PMC3639956; doi:10.1371/journal.pone.0063086)
Supplement: Table S4 — Number of plots occupied by snail species (no. of individuals in brackets) in swamp and drained sites by management type, and their significant habitat preferences according to indicator values. (XLS) [file pone.0063086.s004.xls]

## Sheet: Sheet1
Table S4. Number of plots occupied by snail species (no. of individuals in brackets) in swamp and drained sites by management type (OG – old growth, MM - mature managed forest, RT – green-tree retention cut; CC – clear-cut), and their significant habitat preferences (p<0.05) according to indicator values (IV; %). Habitats (two letters indicate combinations): S – swamp, D – drained; F – forest (in…
Status	Species	No. of occupied stands (no. of individuals)										Preference	IV
		Swamp					Drained
		OG	MM	RT	CC	Total	OG	MM	RT	CC	Total
		n=5	n=5	n=5	n=5	n=20	n=5	n=5	n=5	n=5	n=20
R	Acanthinula aculeata		3(26)	3(15)	2(5)	8(46)	2(9)	3(8)	1(39)		6(56)
R	Acicula polita		1(1)	2(11)	1(2)	4(14)	1(1)		1(1)		2(2)
R	Aegopinella pura		3(15)	2(2)		5(17)	2(24)	3(27)	2(12)	2(7)	9(70)
	Anisus sp.							1(1)			1(1)
	Anisus spirorbis		1(5)			1(5)
	Anisus vortex						1(5)				1(5)
	Aplexa hypnorum				2(3)	2(3)
	Arianta arbustorum		1(1)		1(1)	2(2)	1(3)	1(98)	3(4)	3(61)	8(166)
	Arion circumscriptus		1(1)			1(1)
	Arion hortensis		1(1)	1(1)		2(2)
	Arion sp.		2(4)			2(4)	1(1)	1(1)	2(2)		4(4)
	Arion subfuscus		1(1)		1(1)	2(2)		1(1)	1(1)		2(2)
	Bathyomphalus contortus		1(1)			1(1)	1(1)				1(1)
	Bithynia tentaculata						1(1)				1(1)
	Bradybaena fruticum	4(19)	3(15)	4(26)	4(15)	15(75)	3(24)	4(52)	5(31)	3(71)	15(178)
R	Bulgarica cana								1(1)		1(1)
R	Carychium minimum	3(50)	5(176)	4(295)	4(159)	16(680)	3(54)	2(13)	3(48)	4(28)	12(143)	SC	49.5
	Carychium sp.	2(2)	2(4)	4(159)	2(23)	10(188)	2(11)	2(2)	3(6)	1(1)	8(20)
	Carychium tridentatum	3(19)	3(32)	4(169)	3(40)	13(260)	3(30)	4(28)	3(65)	2(46)	12(169)
	Cepaea hortensis			1(2)		1(2)			2(3)		2(3)
	Clausilia bidentata									1(1)	1(1)
	Clausilia cruciata	1(3)		2(7)	2(4)	5(14)	2(9)	1(6)		1(1)	4(16)
R	Clausilia dubia	1(1)	1(6)	1(2)		3(9)		1(1)			1(1)
	Clausilia pumila			1(1)		1(1)
	Clausilia sp.				1(2)	1(2)
	Clausiliidae	2(2)	2(9)	2(7)	3(7)	9(25)	4(12)	2(4)	2(4)	3(12)	11(32)
	Cochlicopa lubrica	4(112)	5(134)	5(150)	4(75)	18(471)	3(44)	5(44)	5(76)	4(152)	17(316)	S	59.3
	Cochlicopa lubricella	2(5)	2(6)	3(10)	1(1)	8(22)		1(9)	2(12)		3(21)
R	Cochlicopa nitens		1(20)	1(29)	1(61)	3(110)				1(7)	1(7)
	Cochlicopa sp.	3(22)	5(92)	4(69)	3(27)	15(210)	4(21)	3(31)	2(49)	4(30)	13(131)
	Cochlodina laminata	4(13)	4(34)	4(18)	2(5)	14(70)	3(13)	4(16)	5(15)	4(29)	16(73)
R	Cochlodina orthostoma								1(2)		1(2)
	Columella aspera				1(1)	1(1)	1(1)	1(1)			2(2)
	Columella edentula	1(2)	4(15)	4(38)	1(16)	10(71)	4(18)	2(3)	1(12)	3(11)	10(44)
	Columella sp.		1(4)	2(4)		3(8)		1(5)			1(5)
	Deroceras agreste						1(1)			1(1)	2(2)
	Deroceras laeve	1(1)	1(1)			2(2)
	Discus ruderatus	5(75)	5(44)	5(58)	4(40)	19(217)	5(89)	5(56)	5(80)	5(55)	20(280)
	Euconulus alderi	4(84)	5(66)	5(122)	5(190)	19(462)	4(30)	3(22)	3(22)	4(47)	14(121)	SC	47.5
	Euconulus fulvus	5(47)	5(44)	1(18)	4(14)	15(123)	5(71)	4(24)	4(18)	3(17)	16(130)
	Euconulus sp.	5(7)	3(23)	5(48)	4(25)	17(103)	5(14)	3(16)	4(19)	2(6)	14(55)
	Euomphalia strigella								1(2)		1(2)
	Galba truncatula	1(1)	1(1)		2(2)	4(4)			1(3)		1(3)
	Limacidae							1(1)		2(2)	3(3)
	Limax tenellus								2(2)		2(2)
	Lymnaea stagnalis				1(1)	1(1)
	Macrogastra plicatula	2(10)	1(1)	2(5)	1(3)	6(19)	2(7)		4(17)	2(10)	8(34)	DC	33.9
R	Macrogastra ventricosa	1(6)	2(3)			3(9)	1(7)	1(5)	2(2)	1(6)	5(20)
	Nesovitrea hammonis	5(226)	5(333)	5(160)	5(169)	20(888)	5(191)	5(185)	5(165)	5(204)	20(745)	SF	35.2
	Nesovitrea petronella	4(50)	5(41)	5(72)	4(22)	18(185)	4(96)	5(48)	5(52)	5(96)	19(292)
	Nesovitrea sp.	5(64)	5(76)	2(3)	4(8)	16(151)	5(20)	3(31)	4(25)	3(41)	15(117)
	Oxyloma pfeifferi	1(1)			1(1)	2(2)				1(1)	1(1)
R	Perforatella bidentata	4(11)	3(12)	5(34)	3(15)	15(72)	2(6)	3(13)	4(24)	4(26)	13(69)
	Perforatella rubiginosa		1(3)		1(5)	2(8)	1(3)			1(1)	2(4)
	Perforatella sp.	1(1)				1(1)
	Pisidium sp.	2(7)	4(57)	1(2)	2(3)	9(69)		1(1)			1(1)	SF	34.8
	Planorbis planorbis			1(1)	1(1)	2(2)	1(2)				1(2)
	Planorbis sp.						1(1)				1(1)
	Punctum pygmaeum	4(37)	5(113)	5(216)	4(76)	18(442)	5(195)	5(268)	4(83)	5(58)	19(604)
	Ruthenica filograna	1(6)	1(7)	3(15)	1(2)	6(30)						SC	30
	Stagnicola glaber							1(1)			1(1)
	Stagnicola palustris						1(1)				1(1)
R	Succinea oblonga		1(2)	1(1)	1(1)	3(4)	1(1)			1(2)	2(3)
	Succinea putris	1(10)	2(40)	1(20)	2(29)	6(99)	1(3)	1(11)	3(15)	3(14)	8(43)
	Succinea sp.		1(1)	2(8)		3(9)				2(3)	2(3)
	Succineidae		3(22)	1(2)	2(24)	6(48)			1(1)	1(3)	2(4)
	Zonitoides nitidus	3(35)	3(40)	4(31)	3(68)	13(174)	2(15)	2(6)	1(8)	3(5)	8(34)
	Trichia hispida/ Perforatella rubiginosa	1(3)	1(2)	1(4)		3(9)	2(6)	2(5)	2(6)	2(3)	8(20)
	Trichia hispida	1(4)	1(1)	2(3)	1(9)	5(17)	1(2)	3(15)	4(19)	2(18)	10(54)
	Vallonia exentrica/V. pulchella		2(2)	1(1)	1(2)	4(5)
	Vallonia costata	1(12)		1(26)	1(11)	3(49)	3(11)	1(8)	3(90)	2(137)	9(246)	DC	39.7
	Vallonia exentrica		1(2)			1(2)
	Vallonia pulchella		1(1)	1(4)	1(7)	3(12)		1(1)			1(1)
	Valloniidae	1(1)				1(1)
	Valvata cristata							1(1)			1(1)
	Valvata pulchella			1(3)		1(3)
	Vertiginidae						1(1)			2(2)	3(3)
R	Vertigo alpestris	3(10)		1(3)		4(13)	2(5)				2(5)
R	Vertigo angustior			1(1)		1(1)
	Vertigo antivertigo		1(1)	1(1)	4(22)	6(24)	1(1)	1(1)			2(2)	SC	42.9
	Vertigo lilljeborgi				1(6)	1(6)
	Vertigo pusilla	2(6)	3(21)	4(20)	2(7)	11(54)	4(21)	4(9)	2(5)	3(13)	13(48)
R	Vertigo ronnebyensis	1(1)		1(2)	2(4)	4(7)	3(4)				3(4)
	Vertigo sp.	2(6)	2(3)	1(1)		5(10)	1(1)	1(1)	1(3)	1(2)	4(7)
	Vertigo substriata	5(106)	5(64)	5(84)	3(38)	18(292)	5(81)	5(60)	5(50)	5(21)	20(212)
	Vitrea crystallina	2(14)	4(54)	5(26)	3(25)	14(119)	3(18)	3(14)	3(25)	4(54)	13(111)
	Vitrina pellucida	2(3)	2(6)	3(34)	3(7)	10(50)	3(9)	5(28)	4(33)	4(32)	16(102)
	Undetermined snail	2(3)	4(6)	4(9)	3(5)	13(23)	4(15)	2(2)	3(3)	3(8)	12(28)
	Undetermined snail	2(3)	4(6)	4(9)	3(5)	13(23)	4(15)	2(2)	3(3)	3(8)	12(28)
	Total species richness	33 (1099)	43 (1696)	42 (2054)	43 (1290)	57 (6139)	41 (1211)	37 (1185)	35 (1158)	32 (1348)	57 (4902)	9
	Total no. of SPEC	6(79)	7(261)	9(395)	5(247)	12(982)	7(111)	6(67)	7(129)	5(76)	13(383)	1
